# Supplementary material
Source: PubMed Central journal article supplement (PMC9899051)
Supplement: NIHMS1864400-supplement-Supplementary_material.pdf [file NIHMS1864400-supplement-Supplementary_material.pdf]

## Supplementary material for

RNA methylation influences TDP43 binding and disease pathogenesis in models of amyotrophic lateral sclerosis and frontotemporal dementia

Michael McMillan<sup>1,2#</sup>, Nicolas Gomez<sup>1,2#</sup>, Caroline Hsieh<sup>1,2</sup>, Michael Bekier<sup>1</sup>, Xingli Li<sup>1</sup>, Roberto Miguez<sup>1</sup>, Elizabeth M.H. Tank<sup>1</sup> and Sami J. Barmada<sup>1,2\*</sup>

<sup>1</sup>Department of Neurology, University of Michigan, Ann Arbor, MI, 48109, USA

<sup>2</sup>Graduate Program in Cell and Molecular Biology, University of Michigan, Ann Arbor, MI, 48109, USA

#Authors contributed equally

\*To whom correspondence should be addressed:

Sami Barmada

University of Michigan

Department of Neurology

109 Zina Pitcher Place, 4019 BSRB

Ann Arbor, MI 48109

USA

Supplemental Fig. 1 HaloTag insertion in *TARDBP* locus does not affect TDP43 function

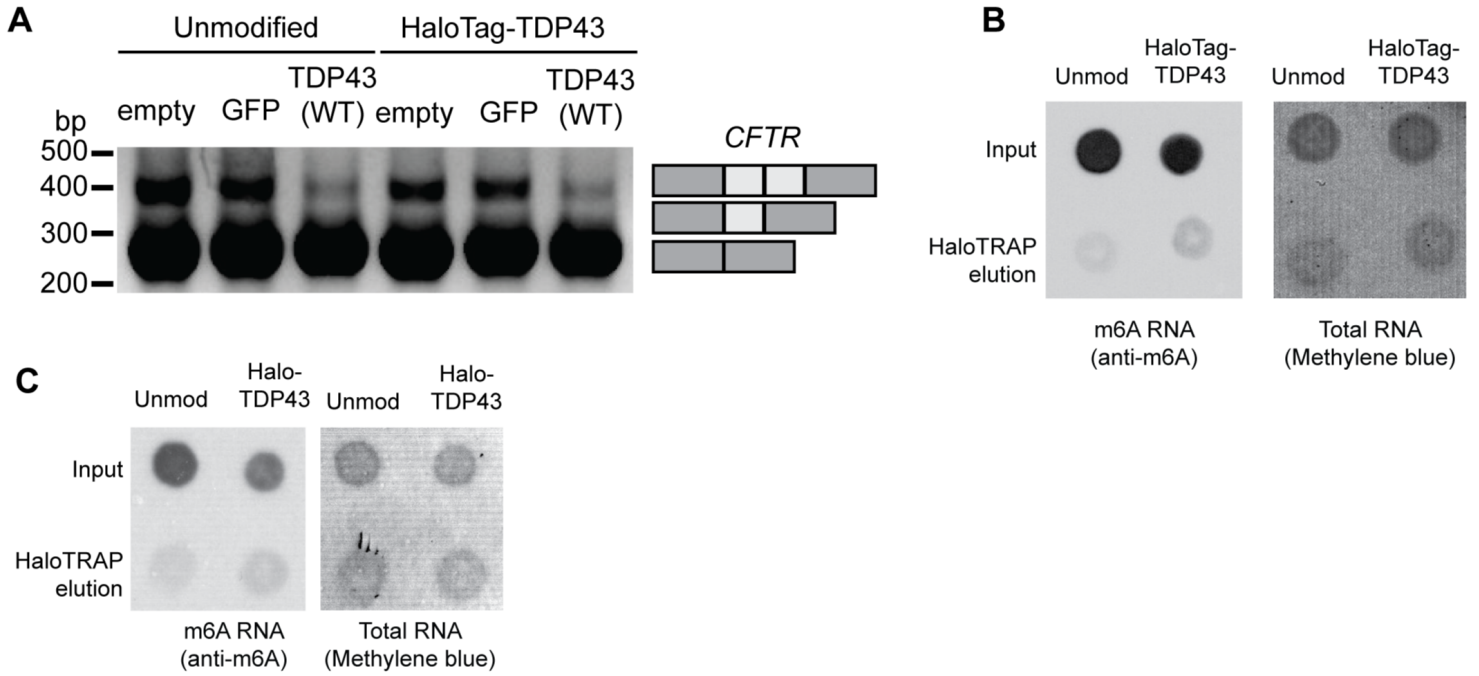

**Supplemental figure 1: HaloTag insertion in *TARDBP* locus does not affect TDP43 function (related to Fig. 1).** (A) *CFTR* minigene splicing assay<sup>7,33,75</sup> in which unmodified or HaloTag-TDP43 HEK293T cells were transfected with the *CFTR* minigene along with EGFP or TDP43-EGFP then analyzed by PCR amplification to measure functional TDP43. Correct TDP43 mediated splicing of the reporter results in exon 9 exclusion. (B) Additional dot blots for total RNA (detected by methylene blue) or m6A-modified RNA (detected by anti-m6A antibody) isolated by immunoaffinity purification of endogenous HaloTag-TDP43 or exogenous HaloTag using Synaptic Systems anti-m6a (#202003) or (C) Millipore Sigma anti-m6A (ABE572-I-100UG) antibodies.

Supplemental Fig. 2: Characterization of TDP43 binding sites, target gene ontology, and predicted protein networks

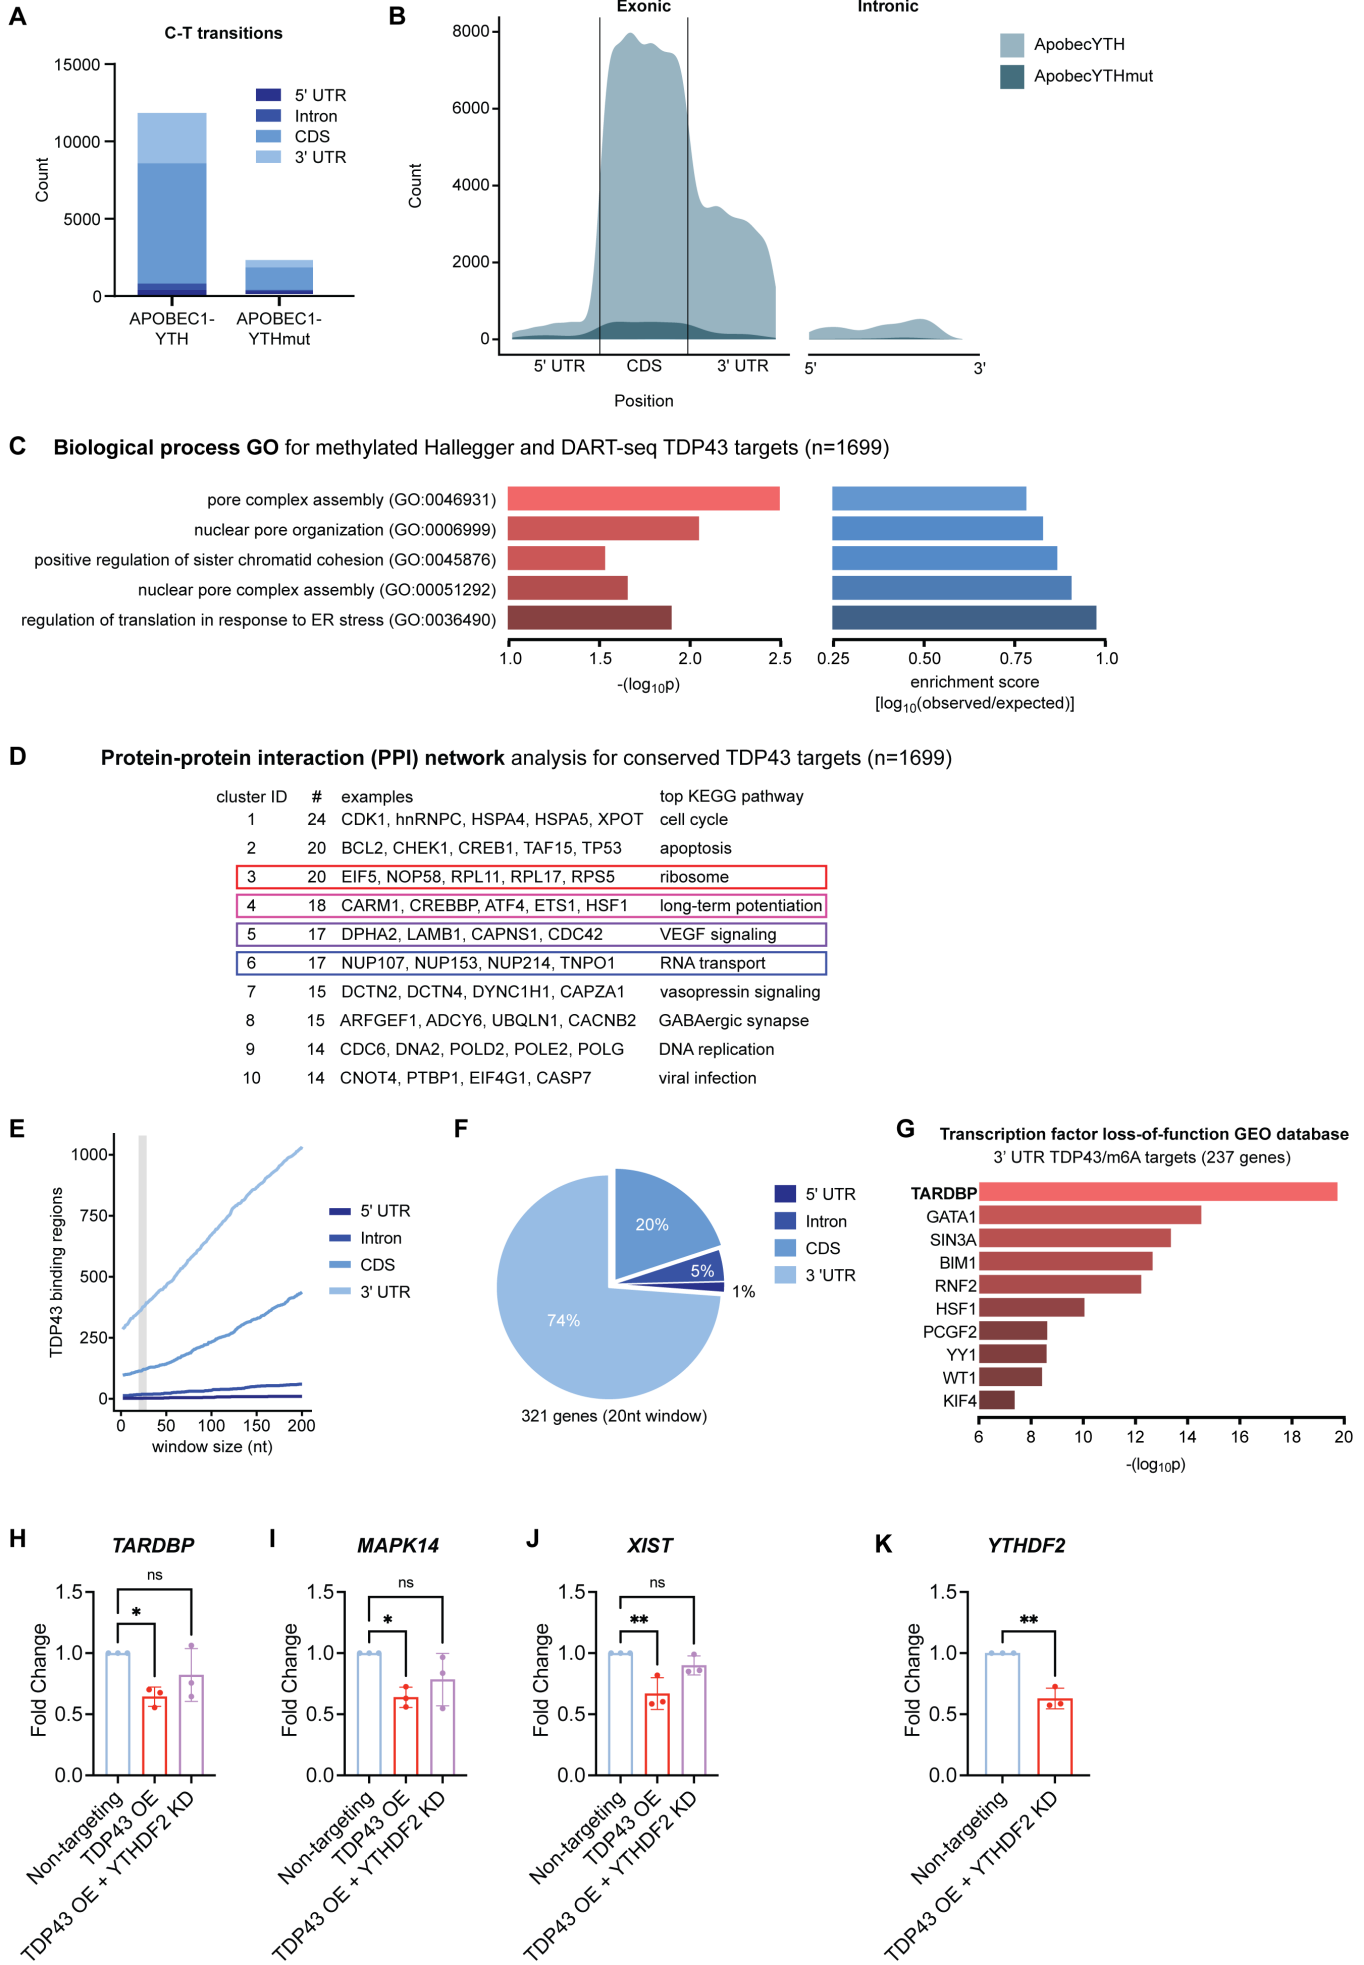

**Supplemental figure 2: Characterization of TDP43 binding sites, target gene ontology, and predicted protein networks (related to Fig. 2).** Absolute count (A) and relative distribution (B) of C-T transitions indicative of m6A modifications located within the coding sequence (CDS), 5' untranslated region (UTR), 3' UTR, and introns in cells expressing APOBEC1-YTH and APOBEC1-YTHmut. (C) Gene ontology for biological processes enriched in TDP43 substrate RNAs (n=1699) common to those identified in this study and Hallegger *et al.* 2021<sup>1</sup>. (D) Protein-protein interaction network analysis<sup>2</sup> for shared TDP43 targets shows enrichment of targets associated with ribosome, long term potentiation, VEGF signaling, and RNA transport. (E) Iterative topological mapping plot depicting the likelihood of finding a TDP43 binding site (as determined by CLIP-seq, Hallegger *et al.* 2021<sup>1</sup>) within the vicinity of a C-T transition (identified by DART-seq, this study), located at position 0. The magnitude and direction of the slopes for lines corresponding to each gene region indicates a positive relationship between TDP43 binding sites and m6A sites primarily within the 3' UTR, but also within the CDS. (F) In the subset of genes exhibiting a TDP43 binding site within 20nt of an m6A site (n=321; grey shading in E), this association was most often detected within the 3' UTR (237/321 genes, or 74%). (G) The 237 genes showing TDP43 binding sites and m6A sites within the 3'UTR were strongly enriched for genes whose expression is regulated by TDP43, as determined by comparison with the transcription factor loss-of-function GEO database. qRT-PCR analysis of (H) TARDBP, (I) MAPK14, and (J) XIST in HEK293 cells following TDP43 overexpression (OE) and/or YTHDF2 knockdown (KD). (K) Only partial KD of YTHDF2 was achieved by transfection with YTHDF2 shRNA. Data in (H)-(J) are shown as mean  $\pm$  SD, collected from 3 biological replicates. In (F)-(H), \*\*p<0.01, \*p<0.05, one-way ANOVA with Dunnett's post test. In (K), \*\*p<0.01, two-tailed t-test.

Supplemental Fig. 3: m6A modifications alter TDP43 binding capabilities

**A**

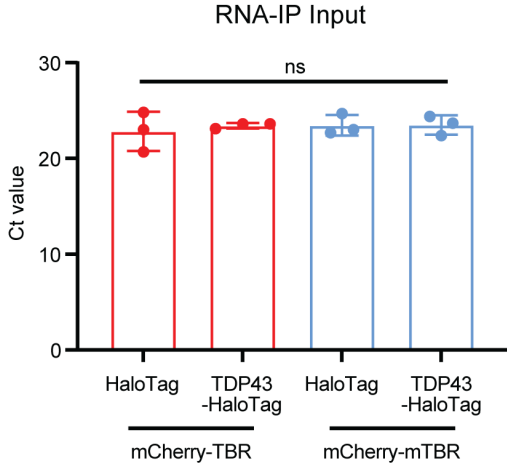

**B**

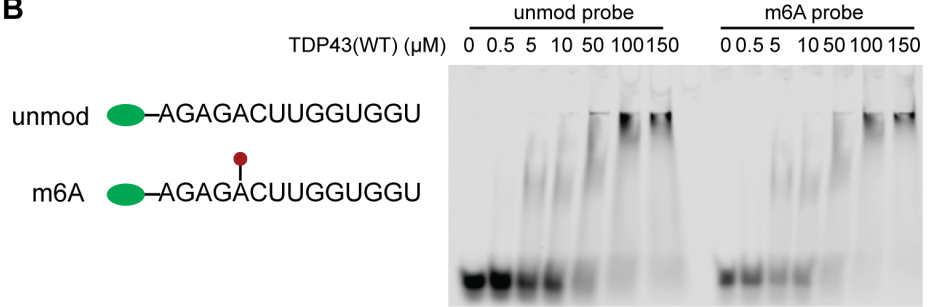

**C**

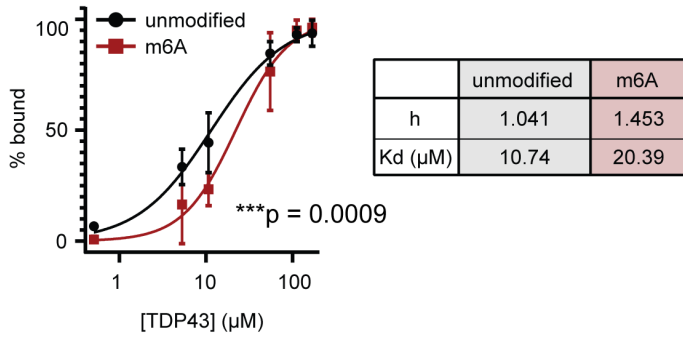

**D**

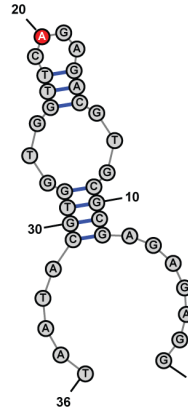

**E**

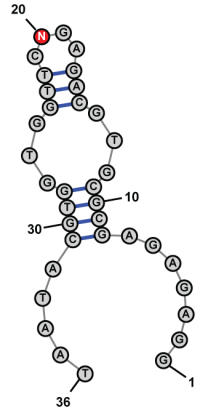

**Supplemental figure 3: m6A modifications alter TDP43 binding capabilities (related to Fig. 3).** (A) qRT-PCR cycle threshold (Ct) values from HaloTag-TDP43 HEK293T cells expressing mCherry-TBR or mCherry-mTBR. Data shown as mean  $\pm$  SD. Individual points represent biological replicates. Ns, not significant by one-way ANOVA with Tukey's post-test. (B) Electromobility shift assay (EMSA) demonstrating binding of recombinant TDP43(WT) to 14nt probe modeled after the TDPBR, with and without m6A modification. Probe concentration was kept constant at 500 pM. (C) Percent bound m6A modified (red) or unmodified (black) RNA probe, plotted as nonlinear regression with Hill slope. \*\*\* $p < 0.0009$ ; extra-sum-of-squares F test. RNA secondary structure prediction for unmodified (D) and m6A-modified (E) CLIP34nt region of the *TARDBP* 3'UTR, using RNAstructure software. The methylated residue is red in each schematic.

## Supplemental Figure 4: Intersection of TDP43 pathology and m6A modified substrates in ALS

**A**

| cluster ID | #  | examples                         | top KEGG pathway   |
|------------|----|----------------------------------|--------------------|
| 1          | 14 | TP53, CARM1, CSNK2A1, SP1, MAPK9 | apoptosis          |
| 2          | 8  | NUP214, NUP98, TNPO2, NDC1       | RNA transport      |
| 3          | 6  | WASF2, MYL6, CDC42, ARPC2        | bacterial invasion |
| 4          | 6  | HNRNPC, NONO, PTBP1, SRSF10      | spliceosome        |
| 5          | 4  | ASXL1, RNF2, UBAP2L, MAPKAPK3    | VEGF signaling     |

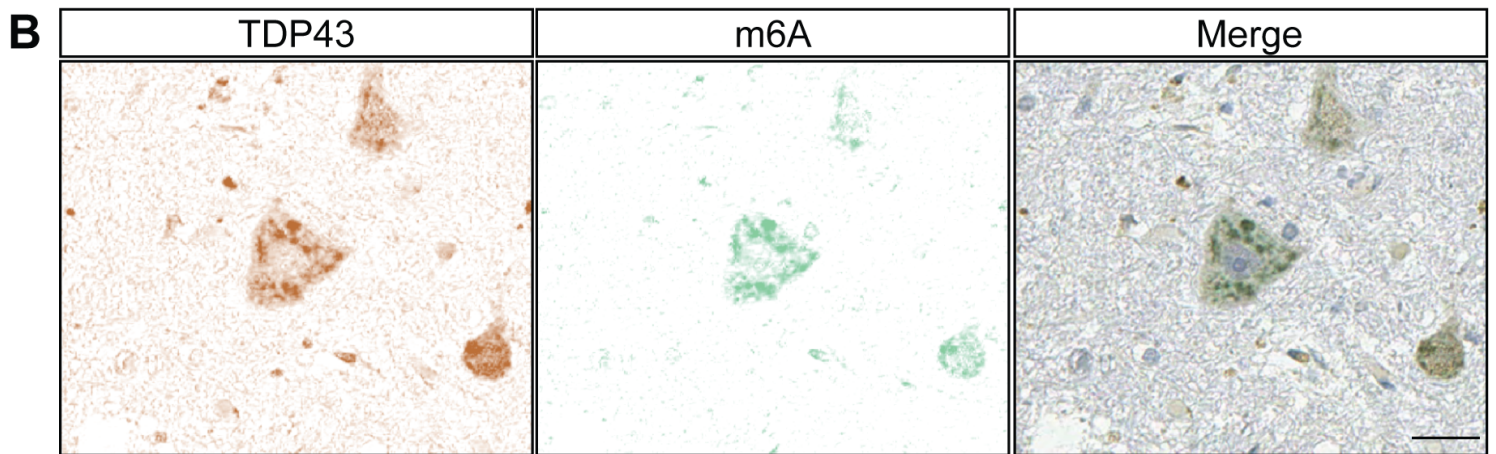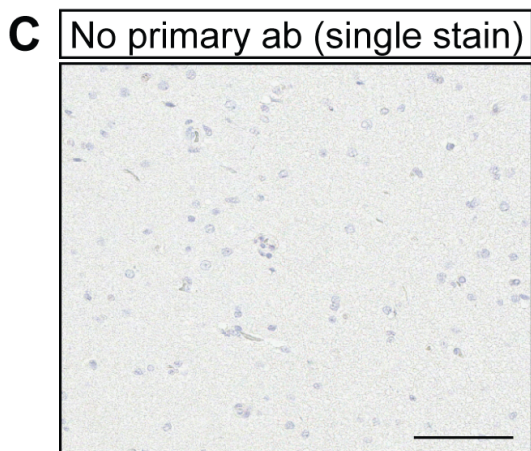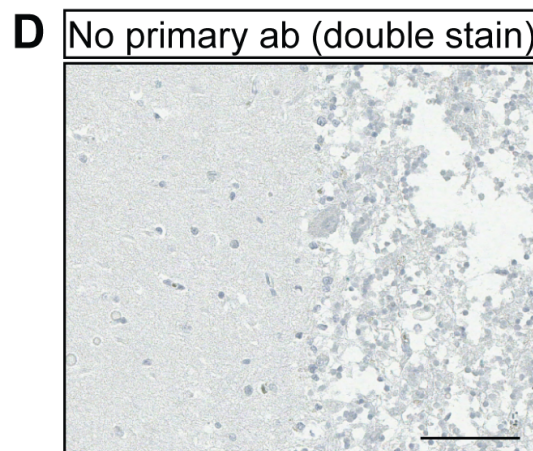



**Supplemental figure 4: Intersection of TDP43 pathology and m6A modified substrates in ALS (related to Fig. 4).** (A) Protein-protein interaction network analysis<sup>2</sup> for 322 hypermethylated TDP43 targets (A1, **Fig. 4G**), showing enrichment for proteins functioning in apoptosis, RNA transport, splicing, and VEGF signaling. (B) Two-color immunohistochemistry for TDP43 (brown) and m6A (green) in sALS spinal cord. The merged image includes a Hematoxylin counter stain for designation of the nucleus. Scale bar, 20 $\mu$ m. Controls include sections stained only with anti-mouse (C) or anti-mouse and anti-rabbit (D) secondary antibodies. Scale bar for (C) and (D), 100 $\mu$ m.

Supplemental Fig. 5: TDP43-mApple expression is proportional to intensity and toxicity

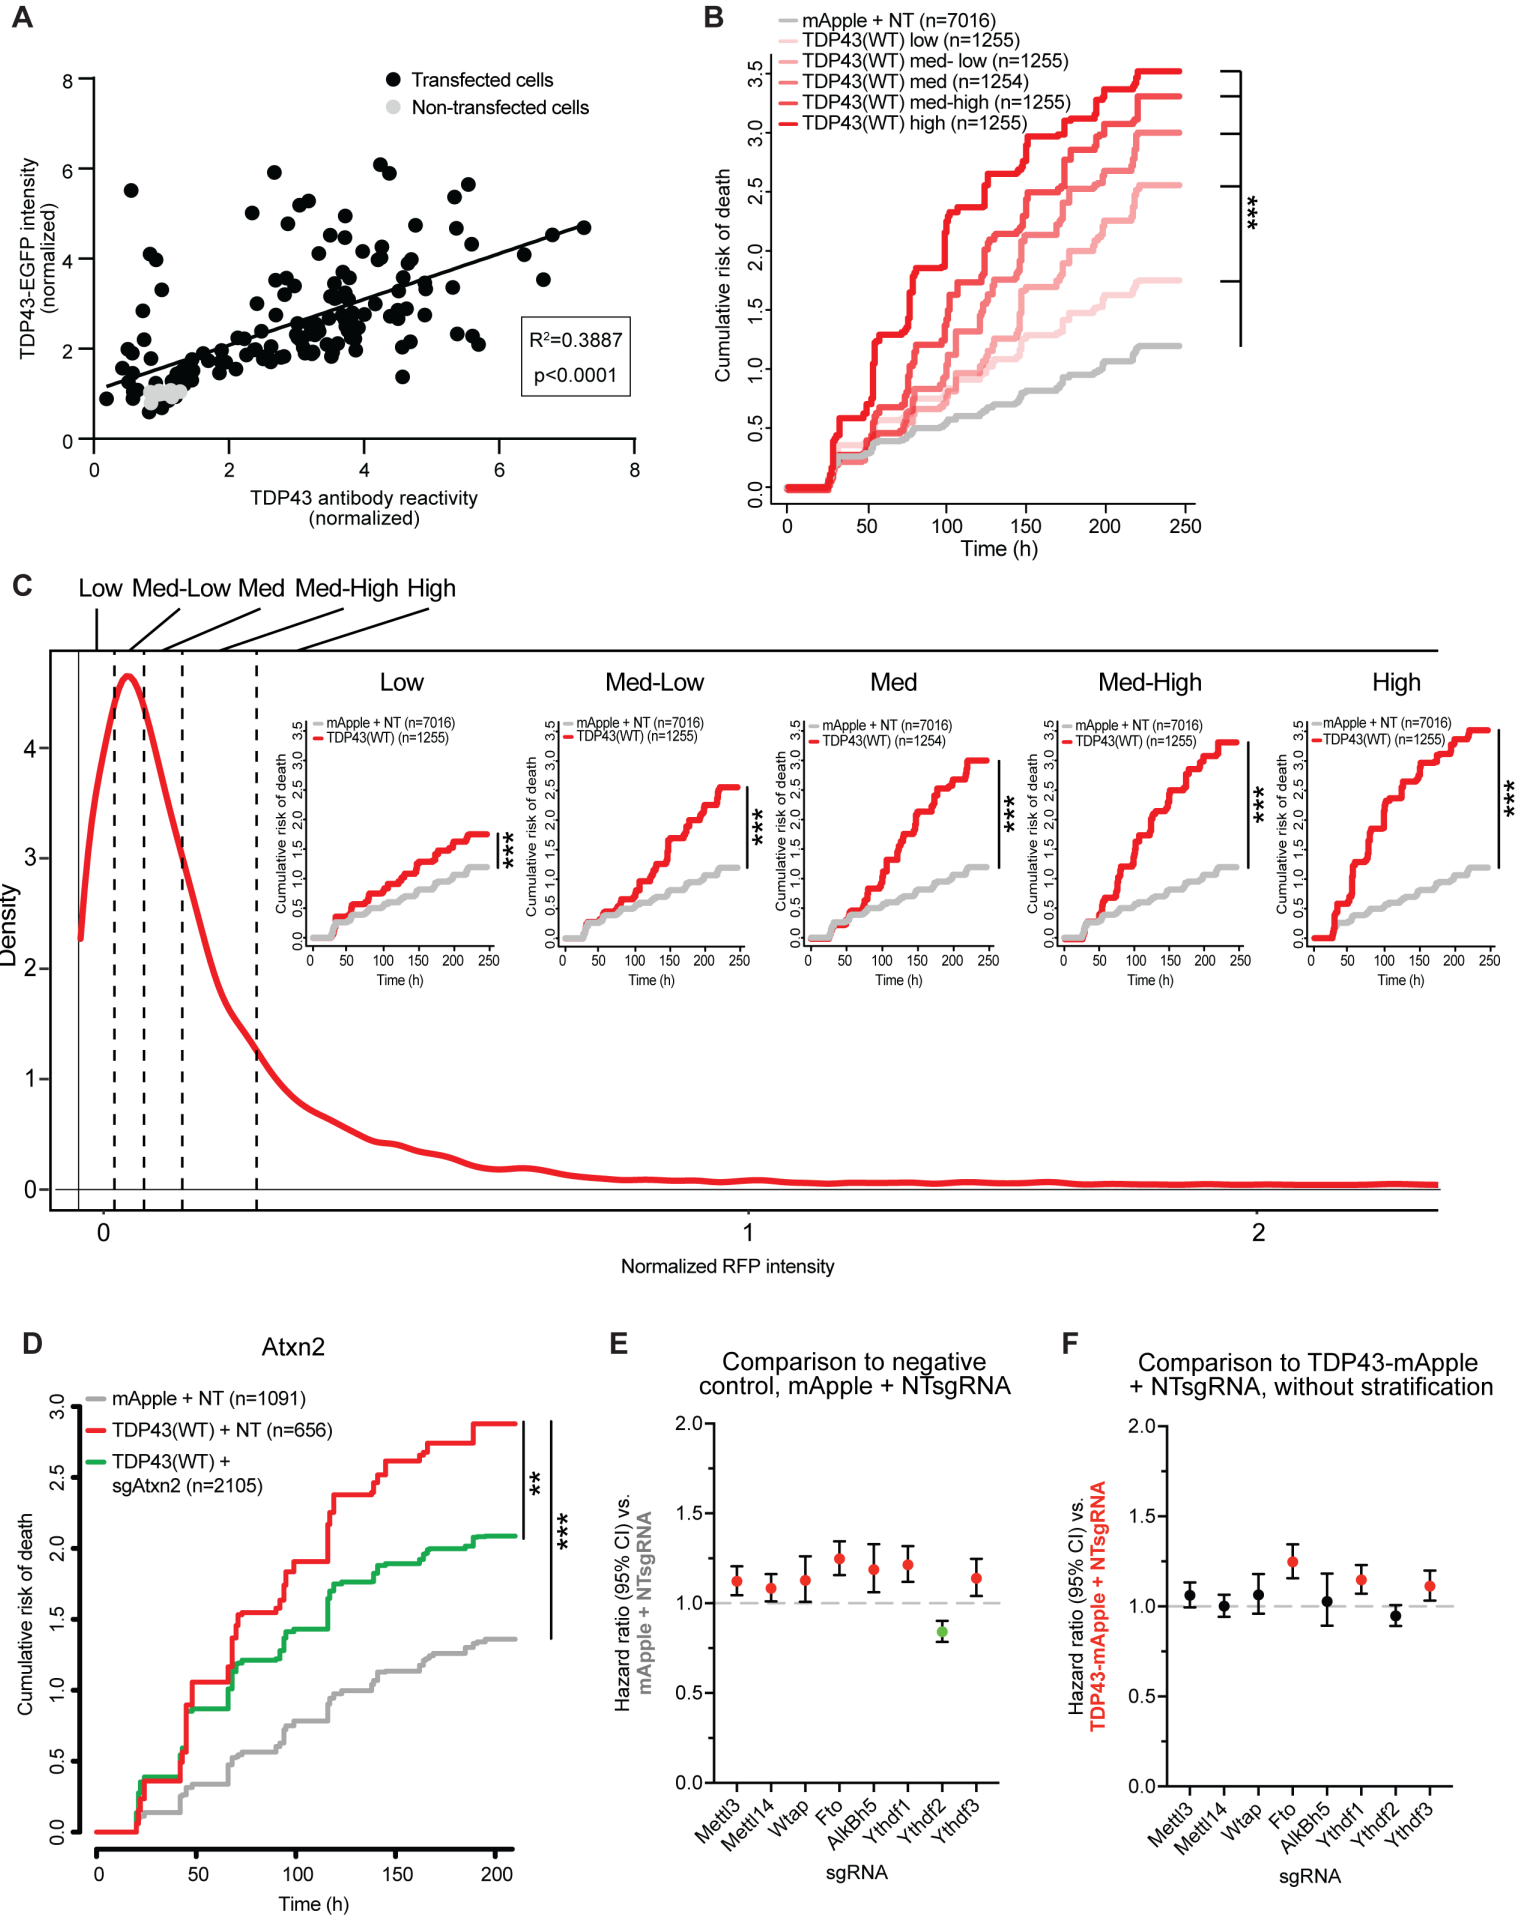

**Supplemental figure 5: TDP43-mApple expression is proportional to intensity and toxicity (related to Fig. 5).** (A) Correlation of single-cell TDP43 protein levels, determined by immunostaining, and RFP fluorescence in neurons overexpressing TDP43(WT)-mApple. Black: transfected cells, n= 144; grey: non-transfected cells, n= 20. (B) Neurons were stratified into 5 quintiles of equal cell number based on TDP43(WT)-mApple intensity, and their risk of death compared via Cox proportional hazards analysis. n= 7016 for mApple + NT; n= 1254 or 1255 cells per quintile. TDP43(WT)-mApple expression is significantly more toxic at all quintiles compared to mApple control: Low HR= 1.38, Med-Low HR= 1.85, Med HR= 2.18, Med-High HR= 2.47, High HR= 2.89. \*\*\*p <2.0 x10<sup>-16</sup> for all quintiles, Cox proportional hazards analysis. (C) Density plot of normalized RFP fluorescence illustrating separation of TDP43(WT)-mApple expression quintiles. Inset graphs correspond to neuronal survival in each quintile, same data as displayed in B. \*\*\*p <2.0 x10<sup>-16</sup> for all quintiles, Cox proportional hazards analysis. (D) *Atxn2* knockout effectively reduces the risk of death in rodent primary neurons overexpressing TDP43 \*\*\*p<2.0x10<sup>-16</sup>, HR= 2.25; \*\*p=6.5x10<sup>-4</sup>, HR= 0.85). (E) With the exception of *Ythdf2*, knockout of most m6a factors increased the risk of death in control rodent primary neurons expressing mApple and NT sgRNA. Plots show hazard ratio (HR) compared to mApple + NT sgRNA, ± 95% CI. Dotted line represents HR=1, the reference value for mApple + NT sgRNA. (F) Relative survival of neurons expressing TDP43-mApple upon knockout of m6A factors, in comparison to TDP43-mApple + NT sgRNA, without stratification for TDP43-mApple expression levels. Dotted line represents HR=1, the reference value for TDP43-mApple + NT sgRNA. For (C)-(F) statistical significance determined by Cox proportional hazards, with a minimum of 3 biological replicates per condition.

Supplemental Fig. 6: YTHDF2 in sALS patient samples and iPSC-derived neurons

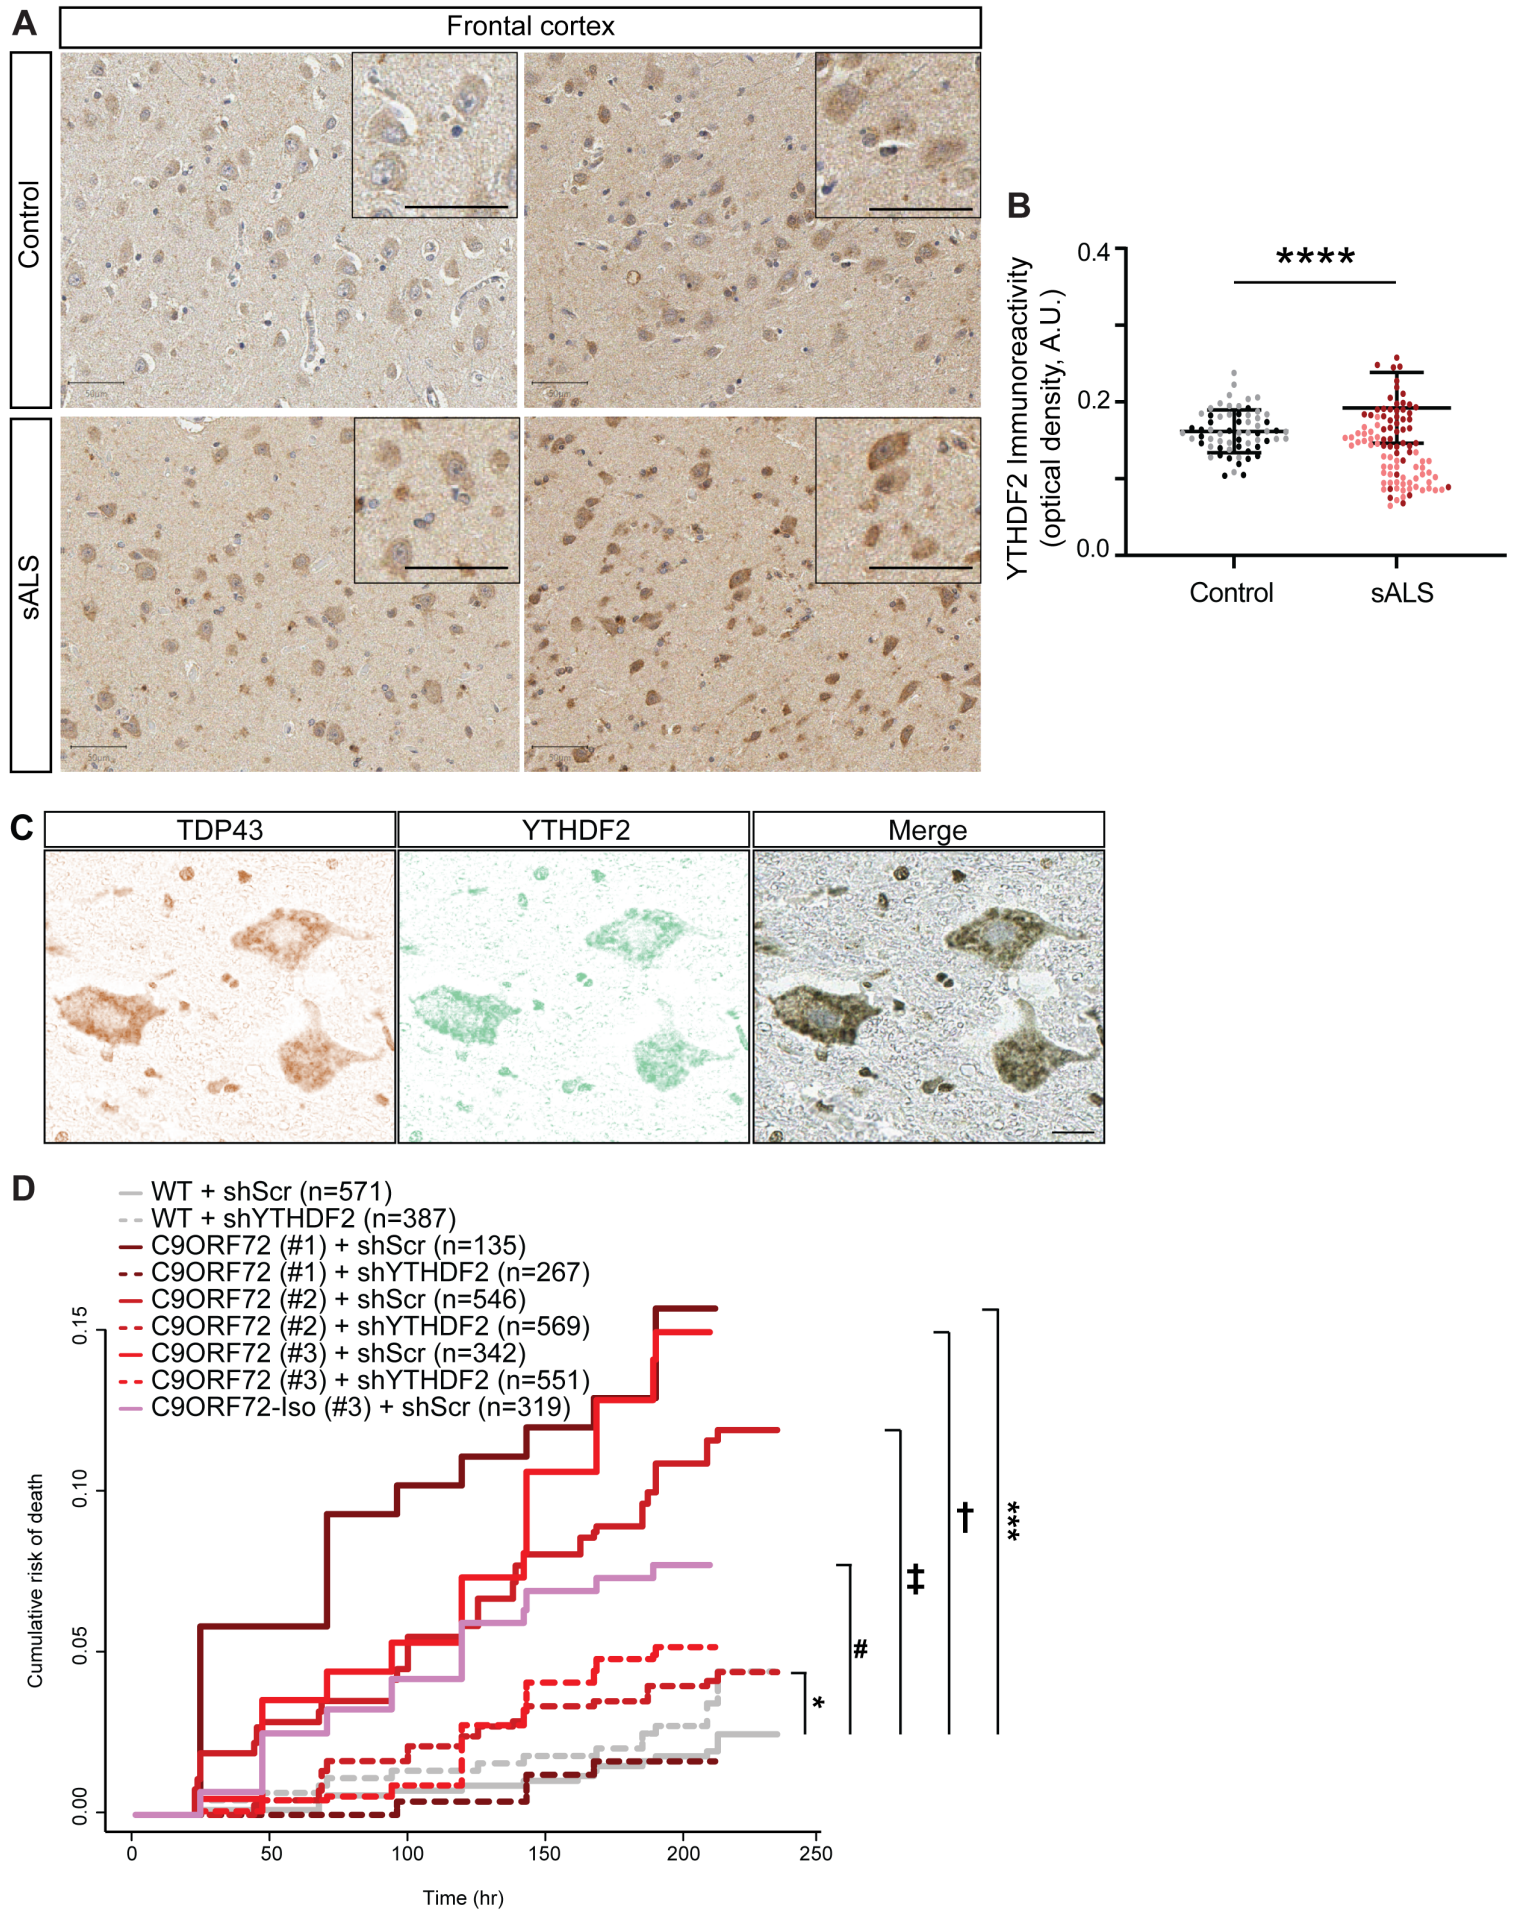

**Supplemental figure 6: YTHDF2 in patient samples and iPSC-derived neurons (related to Fig. 6).** (A) Immunostaining of YTHDF2 in control and sALS patient frontal cortex samples. Scale bar= 50µm. (B) Quantification of YTHDF2 immunoreactivity in frontal cortex neurons from control (n= 65) and sALS (n= 99) samples. \*\*\*\*p<0.0001, Mann-Whitney test. (C) Two-color immunohistochemistry of TDP43 (brown) and YTHDF2 (green) in sALS spinal cord. Hematoxylin counter stain outlines the nucleus in the merged image. Scale bar= 20µm. (D) Knockout of YTHDF2 in C9ORF72 iNeurons reduces toxicity (\*\*p =  $1.33 \times 10^{-6}$ , HR= 7.36; †p=  $6.74 \times 10^{-9}$ , HR= 5.21; ‡p=  $1.16 \times 10^{-3}$ , HR= 6.90; #p= 0.045, HR= 1.9. \*p= 0.031, HR= 3.66). Statistical significance determined by Cox proportional hazards.

**Table S1: Post-mortem samples (related to Figs. 4 and 6)**

| Diagnosis | Age | Sex | Experiment                          |
|-----------|-----|-----|-------------------------------------|
| Control 1 | 66  | M   | m6A array (Fig. 4)                  |
| Control 2 | 85  | M   | m6A array (Fig. 4)                  |
| Control 3 | 68  | M   | m6A array (Fig. 4)                  |
| sALS 1    | 65  | M   | m6A array (Fig. 4)                  |
| sALS 2    | 64  | M   | m6A array (Fig. 4)                  |
| sALS 3    | 65  | M   | m6A array (Fig. 4)                  |
| sALS 4    | 81  | M   | m6A array (Fig. 4)                  |
| Control 4 | 76  | F   | m6A IHC (Fig. 4)                    |
| Control 5 | 88  | M   | m6A IHC, YTHDF2 IHC (Figs. 4 and 6) |
| Control 6 | 56  | M   | m6A IHC, YTHDF2 IHC (Figs. 4 and 6) |
| ALS 1     | 66  | F   | m6A IHC (Fig. 4)                    |
| ALS 2     | 64  | M   | m6A IHC (Fig. 4)                    |
| ALS 3     | 68  | M   | m6A IHC (Fig. 4)                    |
| Control 7 | 48  | M   | YTHDF2 IHC (Fig. 6)                 |
| ALS 4     | 76  | M   | YTHDF2 IHC (Fig. 6)                 |
| ALS 4     | 60  | F   | YTHDF2 IHC (Fig. 6)                 |
| ALS 6     | 99  | M   | YTHDF2 IHC (Fig. 6)                 |

**Table S2: Plasmids (related to STAR Methods)**

| Construct                                   | Reference/<br>Source                           | sgRNA<br>target | sgRNA sequence (5' to 3') |
|---------------------------------------------|------------------------------------------------|-----------------|---------------------------|
| pGW1-EGFP                                   | refs. <sup>4,5</sup>                           | N/A             | N/A                       |
| pGW1-mApple                                 | refs. <sup>4,5</sup>                           | N/A             | N/A                       |
| pGW1-TDP43(WT)-EGFP                         | refs. <sup>4,5</sup>                           | N/A             | N/A                       |
| pGW1-Halo                                   | ref. <sup>6</sup>                              | N/A             | N/A                       |
| pGW1-TDP43-TEV-Halo                         | ref. <sup>7</sup>                              | N/A             | N/A                       |
| pCMV-APOBEC1-YTH                            | ref. <sup>8</sup>                              | N/A             | N/A                       |
| pCMV-APOBEC1-YTHmut                         | ref. <sup>8</sup>                              | N/A             | N/A                       |
| pCaggs-mCherry-TBR                          | refs. <sup>6,7,9</sup>                         | N/A             | N/A                       |
| pE-6xHis-SUMO-TDP43(WT)                     | ref. <sup>7</sup>                              | N/A             | N/A                       |
| <i>CFTR</i> minigene                        | ref. <sup>3</sup>                              | N/A             | N/A                       |
| pSpCas9(BB)-2A-GFP                          | Addgene<br>#48138                              | N/A             | N/A                       |
| pcDNA-flag-YTHDF2                           | Addgene<br>#52300                              | N/A             | N/A                       |
| pcDNA-flag-METTL3                           | Addgene<br>#53739                              | N/A             | N/A                       |
| pcDNA-flag-METTL14                          | Addgene<br>#53740                              | N/A             | N/A                       |
| GIPZ Non-silencing Lentiviral shRNA Control | Horizon<br>Discovery<br>#RHS4346               | N/A             | N/A                       |
| GIPZ Lentiviral Human YTHDF2 shRNA          | Horizon<br>Discovery<br>#RHS4430-<br>200182983 | N/A             | N/A                       |

|                                    |            |                              |                                           |
|------------------------------------|------------|------------------------------|-------------------------------------------|
| pGW1-YTHDF2-Halo                   | This paper | N/A                          | N/A                                       |
| pGW1-YTHDF2-2A-GFP                 | This paper | N/A                          | N/A                                       |
| pCaggs-mCherry-mTBR                | This paper | TARDBP<br>3' UTR,<br>SDM A-G | F: CATTATGCACCACCAAGCCTCTGCAC<br>GCGCTCTC |
|                                    |            |                              | R: GCTTTGCAGGAGGGCTTGAAGCAGAG             |
| pSpCas9(BB)-2A-GFP + NeuN sgRNA    | This paper | NeuN                         | F: CACCGACCGTCTGGGTCCCAGCGAT              |
|                                    |            |                              | R: AAACATCGCTGGGACCCAGACGGTC              |
| pSpCas9(BB)-2A-GFP + Mettl3 sgRNA  | This paper | Mettl3                       | F: CACCGGCTGGGCTTAGGGCCACTAG              |
|                                    |            |                              | R: AAACCTAGTGGCCCTAAGCCCAGCC              |
| pSpCas9(BB)-2A-GFP + Mettl14 sgRNA | This paper | Mettl14                      | F: CACCGGATTCTTCTGGAGCCTCCTC              |
|                                    |            |                              | R: AAACGAGGAGGCTCCAGAAGAATCC              |
| pSpCas9(BB)-2A-GFP + Wtap sgRNA    | This paper | Wtap                         | F: CACCGGCCGCCAGTCACACAGGCCG              |
|                                    |            |                              | R: AAACCGGCCTGTGTGACTGGCGGCC              |
| pSpCas9(BB)-2A-GFP + Fto sgRNA     | This paper | Fto                          | F: CACCGGCTGCACAAAGAGGTCCCCG              |
|                                    |            |                              | R: AAACCGGGGACCTCTTTGTGCAGCG              |
| pSpCas9(BB)-2A-GFP + Alkbh5 sgRNA  | This paper | Alkbh5                       | F: CACCGGCCTGCCTTGTAGTTGTCCC              |
|                                    |            |                              | R: AAACGGGACAACACTACAAGGCAGGCC            |
| pSpCas9(BB)-2A-GFP + Ythdf1 sgRNA  | This paper | Ythdf1                       | F: CACCGGCTGTTTTTGGGCAACCTGG              |
|                                    |            |                              | R: AAACCCAGGTTGCCCAAAAACAGCC              |
| pSpCas9(BB)-2A-GFP + Ythdf2 sgRNA  | This paper | Ythdf2                       | F: CACCGGCTGTAGTAACTGGGTAAGT              |
|                                    |            |                              | R: AAACACTTACCCAGTTACTACAGCC              |
| pSpCas9(BB)-2A-GFP + Ythdf3 sgRNA  | This paper | Ythdf3                       | F: CACCGGCTCTCCCAAGAGAACTAGG              |
|                                    |            |                              | R: AAACCCTAGTTCTCTTGGGAGAGCC              |
| pSpCas9(BB)-2A-GFP + Atxn2 sgRNA   | This paper | Atxn2                        | F: CACCGCAGCAGTTCTCGAGGAGGG               |
|                                    |            |                              | R: AAACCCCTCCTCGAGAACTGCTGC               |



**Table S3: Antibodies (related to STAR Methods)**

| Target                                           | Source                           | Catalog #      | RRID       | Species | Dilution |
|--------------------------------------------------|----------------------------------|----------------|------------|---------|----------|
| TDP43                                            | Proteintech                      | 10782-2-AP     | AB_2892214 | Rabbit  | 1:100    |
| NeuN                                             | Cell Signaling Technologies      | 24307T         | AB_2651140 | Rabbit  | 1:500    |
| YTHDF2                                           | Proteintech                      | 24744-1-AP     | AB_2687435 | Rabbit  | 1:100    |
| m6A                                              | Millipore Sigma                  | ABE572         | AB_2892213 | Rabbit  | 1:500    |
| m6A                                              | Cell Signaling Technologies      | 56593S         | AB_2799515 | Rabbit  | 1:500    |
| m6A                                              | Millipore Sigma                  | ABE572-I-100UG | AB_2892214 | Rabbit  | 1:500    |
| HaloTag ligand (JF646 dye)                       | Promega                          | GA1120         | N/A        | N/A     | 1:20,000 |
| Anti-rabbit Alexa Fluor 488 (secondary antibody) | ThermoFisher                     | A-11034        | N/A        | Goat    | 1:250    |
| Anti-rabbit HRP (secondary antibody)             | Jackson ImmunoResearch Labs Inc. | 111-035-003    | N/A        | Goat    | 1:10,000 |

**Table S4: Oligonucleotides (related to STAR Methods)**

| Target              | Source                                  | Sequence (5' to 3')                 |
|---------------------|-----------------------------------------|-------------------------------------|
| mCherry             | This paper                              | F: ATGGTGAGCAAGGGCGAGGA             |
|                     |                                         | R: GATCTCGAACTCGTGGCC               |
| <i>CFTR</i>         | Ayala <i>et al.</i> , 2006 <sup>3</sup> | F: caactcaagctcctaagccactgc         |
|                     |                                         | R: taggatccggtcaccaggaagtggtaaataca |
| Clip34nt_unmodified | This paper                              | 5IR800CWN-AGAGACUUGGUGGU            |
| Clip34nt_m6A        | This paper                              | 5IR800CWN-AGAG/iN6Me-A/CUUGGUGGU    |
| N_TARDBP_F          | This paper                              | CACCGGAAATACCATCGGAAGACGA           |
| N_TARDBP_R          | This paper                              | CACCGGGGCTCATCGTTCTCATCTT           |
| YTHDF2_F            | This paper                              | GATGCCGCCTATCGTTCCAT                |
| YTHDF2_R            | This paper                              | ACGTCAAACGACCCTTCCA                 |
| TARDBP_F            | This paper                              | GTGGCTCTAATTCTGGTGCAAG              |
| TARDBP_R            | This paper                              | CACAACCCCACTGTCTACATT               |
| XIST_F              | This paper                              | CCCTACTGCGCTTTTTGCTG                |
| XIST_R              | This paper                              | AAATGCAAGGGCGACTGGTA                |
| MAPK14_F            | This paper                              | GCATAATGGCCGAGCTGTTG                |
| MAPK14_R            | This paper                              | TGGCTTGGCATCCTGTTAATG               |
| GAPDH_F             | This paper                              | AAGGTGAAGGTCGGAGTCAA                |
| GAPDH_R             | This paper                              | AATGAAGGGGTCATTGATGG                |

**Table S5: Cell lines (related to STAR Methods)**

| Name                | Source                                | Identifier               |
|---------------------|---------------------------------------|--------------------------|
| HEK293T             | ATCC                                  | CRL-3216                 |
| Primary rat neurons | Charles River Laboratories            | Long-Evans rats (Cri:LE) |
| Human iPSCs         | University of Michigan ALS Repository | 1021, 0883, 0312         |
|                     | Cedars Sinai iPSC Repository          | Cs29i, Cs29              |

**Table S6: Human iPSC lines (related to STAR Methods)**

| Line  | Identifier        | Gene           | Mutation                         | Sex | Age at biopsy | Age at onset | Tag                | Integrated cassette            |
|-------|-------------------|----------------|----------------------------------|-----|---------------|--------------|--------------------|--------------------------------|
| 1021  | WT                | <i>TARDBP</i>  | -                                | F   | 54            | -            | TDP43-Dendra 2 (C) | CLYBL:TO -hNgn1/2 <sup>6</sup> |
| 1021  | M337V             | <i>TARDBP</i>  | Isogenic M337V <sup>10</sup>     | F   | 54            | -            | TDP43-Dendra 2 (C) | CLYBL:TO -hNgn1/2 <sup>6</sup> |
| 312   | C9ORF7 2 (#1)     | <i>C9ORF72</i> | HRE                              | M   | 52            | 54           | -                  | CLYBL:TO -hNgn1/2 <sup>6</sup> |
| 883   | C9ORF7 2 (#2)     | <i>C9ORF72</i> | HRE                              | M   | 49            | 51           | -                  | CLYBL:TO -hNgn1/2 <sup>6</sup> |
| Cs29i | C9ORF7 2 (#3)     | <i>C9ORF72</i> | HRE                              | M   | 47            | NA           | -                  | CLYBL:TO -hNgn1/2 <sup>6</sup> |
| Cs29i | C9ORF7 2 ISO (#3) | <i>C9ORF72</i> | Isogenic corrected <sup>11</sup> | M   | 47            | NA           | -                  | CLYBL:TO -hNgn1/2 <sup>6</sup> |

NA: not assessed; HRE, hexanucleotide repeat expansion mutation; (C), carboxyl terminus

## Supplemental References

1. Hallegger, M., Chakrabarti, A.M., Lee, F.C.Y., Lee, B.L., Amalietti, A.G., Odeh, H.M., Copley, K.E., Rubien, J.D., Portz, B., Kuret, K., et al. (2021). TDP-43 condensation properties specify its RNA-binding and regulatory repertoire. *Cell* 184, 4680-4696.e22. 10.1016/J.CELL.2021.07.018.
2. Szklarczyk, D., Gable, A.L., Nastou, K.C., Lyon, D., Kirsch, R., Pyysalo, S., Doncheva, N.T., Legeay, M., Fang, T., Bork, P., et al. (2021). The STRING database in 2021: customizable protein–protein networks, and functional characterization of user-uploaded gene/measurement sets. *Nucleic Acids Res.* 49, D605. 10.1093/NAR/GKAA1074.
3. Ayala, Y.M., Pagani, F., and Baralle, F.E. (2006). TDP43 depletion rescues aberrant CFTR exon 9 skipping. *FEBS Lett.* 580, 1339–1344. 10.1016/J.FEBSLET.2006.01.052.
4. Barmada, S.J., Skibinski, G., Korb, E., Rao, E.J., Wu, J.Y., and Finkbeiner, S. (2010). Cytoplasmic mislocalization of TDP-43 is toxic to neurons and enhanced by a mutation associated with familial amyotrophic lateral sclerosis. *J. Neurosci.* 30, 639–649. 10.1523/JNEUROSCI.4988-09.2010.
5. Barmada, S.J., Serio, A., Arjun, A., Bilican, B., Daub, A., Ando, D.M., Tsvetkov, A., Pleiss, M., Li, X., Peisach, D., et al. (2014). Autophagy induction enhances TDP43 turnover and survival in neuronal ALS models. *Nat. Chem. Biol.* 10, 677. 10.1038/NCHEMBIO.1563.
6. Weskamp, K., Tank, E.M., Miguez, R., McBride, J.P., Gómez, N.B., White, M., Lin, Z., Gonzalez, C.M., Serio, A., Sreedharan, J., et al. (2020). Shortened TDP43 isoforms upregulated by neuronal hyperactivity drive TDP43 pathology in ALS. *J. Clin. Invest.* 130, 1139–1155. 10.1172/JCI130988.
7. Flores, B.N., Li, X., Malik, A.M., Martinez, J., Beg, A.A., and Barmada, S.J. (2019). An Intramolecular Salt Bridge Linking TDP43 RNA Binding, Protein Stability, and TDP43-Dependent Neurodegeneration. *Cell Rep.* 27, 1133-1150.e8. 10.1016/j.celrep.2019.03.093.
8. Meyer, K.D. (2019). DART-seq: an antibody-free method for global m6A detection. *Nat. Methods*, 1–6. 10.1038/s41592-019-0570-0.
9. Barmada, S.J., Ju, S., Arjun, A., Batarse, A., Archbold, H.C., Peisach, D., Li, X., Zhang, Y., Tank, E.M.H., Qiu, H., et al. (2015). Amelioration of toxicity in neuronal models of amyotrophic lateral sclerosis by hUPF1. *Proc. Natl. Acad. Sci. U. S. A.* 112, 7821–7826. 10.1073/PNAS.1509744112.
10. Sidibé, H., Khalfallah, Y., Xiao, S., Gómez, N.B., Fakim, H., Tank, E.M.H., Tomasso, G. Di, Bareke, E., Aulas, A., McKeever, P.M., et al. (2021). TDP-43 stabilizes G3BP1 mRNA: relevance to amyotrophic lateral sclerosis/frontotemporal dementia. *Brain* 144, 3461. 10.1093/BRAIN/AWAB217.
11. Ho, R., Workman, M.J., Mathkar, P., Wu, K., Kim, K.J., O'Rourke, J.G., Kellogg, M., Montel, V., Banuelos, M.G., Arogundade, O.A., et al. (2021). Cross-Comparison of Human iPSC Motor Neuron Models of Familial and Sporadic ALS Reveals Early and Convergent Transcriptomic Disease Signatures. *Cell Syst.* 12, 159-175.e9. 10.1016/J.CELS.2020.10.010.
12. Kierzek, E., Zhang, X., Watson, R.M., Kennedy, S.D., Szabat, M., Kierzek, R., and

Mathews, D.H. (2022). Secondary structure prediction for RNA sequences including N6-methyladenosine. *Nat. Commun.* 2022 13:13, 1–10. [10.1038/s41467-022-28817-4](https://doi.org/10.1038/s41467-022-28817-4).
